# Supplementary material for: FPCB as an Acoustic Matching Layer for 1D Linear Ultrasound Transducer Arrays
Source: MDPI journal article supplement (doi:10.3390/s22155557), 2022-07-25
Supplement: s1 [file s1]

## Supplementary Material

# FPCB as an Acoustic Matching Layer for 1D Linear Ultrasound Transducer Arrays

Taemin Lee <sup>1,†</sup>, Joontaek Jung <sup>2,†</sup>, Sang-Mok Lee <sup>1</sup>, Jongcheol Park <sup>2</sup>, Jae-Hyeong Park <sup>3</sup>, Kyung-Wook Paik <sup>4</sup>, and Hyunjoo J. Lee <sup>1,\*</sup>

<sup>1</sup>*School of Electrical Engineering, Korea Advanced Institute of Science and Technology, Daejeon 34141, Republic of Korea; leetm@kaist.ac.kr (T.L.); mock0920@kaist.ac.kr (S.-M.L.)*

<sup>2</sup>*Office of Nano Convergence Technology, National NanoFab Center, Daejeon 34141, Republic of Korea; jjt@nnfc.re.kr (J.J.); jcpark@nnfc.re.kr (J.P.)*

<sup>3</sup>*Samsung Foundry, Samsung Electronics co., Ltd; jh3375.park@samsung.com (J.-H.P.)*

<sup>4</sup>*Department of Materials Science and Engineering, Korea Advanced Institute of Science and Technology, Daejeon 34141, Republic of Korea; kwpaik@kaist.ac.kr (K.-W.P.)*

*\*Correspondence: hyunjoo.lee@kaist.ac.kr; Tel.: +82-42-350-7536 (H.J.L.)*

*†These authors contributed equally to this work.*

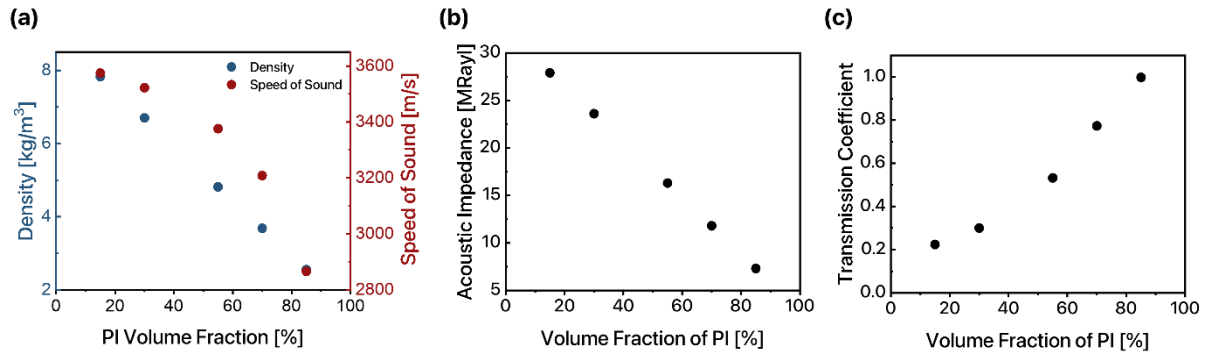

**Figure S1.** Theoretical acoustic properties of the FPCB matching layer composed of different volume fractions of polyimide and copper: (a) density and speed of sound, (b) acoustic impedance, and (c) transmission coefficient.

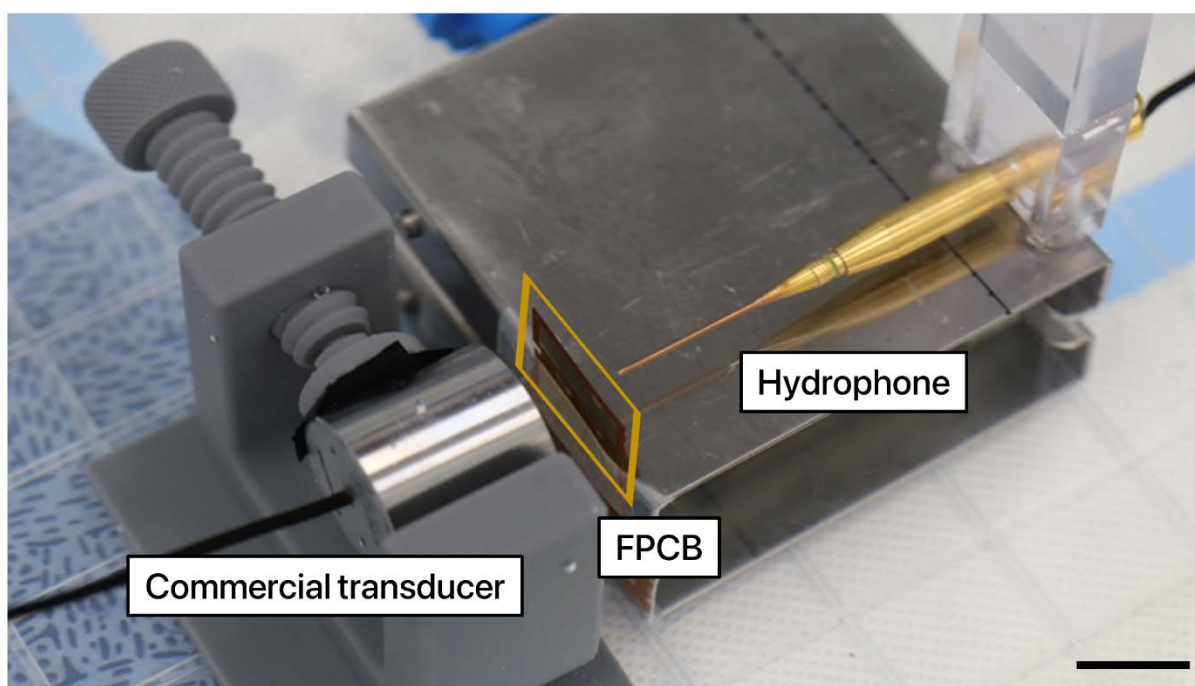

**Figure S2.** Photo of the experimental setup for acoustic characterization of the FPCB matching layer (scale bar: 2 cm).

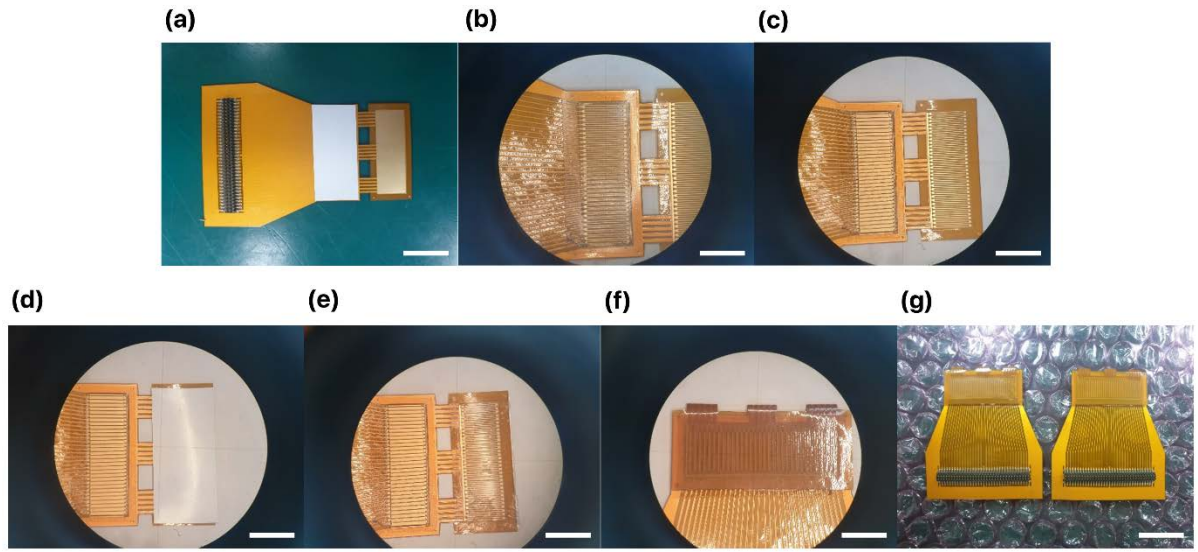

**Figure S3.** Optical images of the packaging steps: (a) ACF lamination on the FPCB substrate (scale bar: 2 cm), (b) removal of ACF space film from the FPCB substrate (scale bar: 7 mm), (c) ACF pre-bonding and delamination of the UV film from piezoelectric elements (scale bar: 1 cm), (d) ACF lamination on the FPCB matching layer (scale bar: 1 cm), (e) removal of ACF space film from the FPCB matching layer (scale bar: 1 cm), (f) final ACF bonding of the FPCB matching layer and piezoelectric elements (scale bar: 7 mm), and (g) successfully packaged devices (scale bar: 2 cm).
